# Supplementary material for: A DNA Mini-Barcoding System for Authentication of Processed Fish Products
Source: PubMed Central journal article supplement (PMC4626862; doi:10.1038/srep15894), 2015-10-30
Supplement: srep15894-s1.pdf [file srep15894-s1.pdf]

## **Supplementary Materials:**

### **A DNA Mini-Barcoding System for Authentication of Processed Fish Products**

Shadi Shokralla<sup>1, 2,\*</sup>, Rosalee S. Hellberg<sup>3,\*</sup>, Sara M. Handy<sup>4</sup>, Ian King<sup>1</sup> and Mehrdad Hajibabaei<sup>1</sup>

<sup>1</sup>Biodiversity Institute of Ontario and Department of Integrative Biology, University of Guelph, Guelph, ON N1G 2W1, Canada.

<sup>2</sup>Department of Microbiology, Mansoura University, Mansoura 35516, Egypt.

<sup>3</sup>Chapman University, Schmid College of Science and Technology, Orange, CA 92866, USA.

<sup>4</sup>Office of Regulatory Science, Center for Food Safety and Applied Nutrition, U.S. Food and Drug Administration, College Park, MD 20740, USA.

\*These authors contributed equally to this work. Correspondence and requests for materials should be addressed to S.S. (email: sshokral@uoguelph.ca).

**Table S1** The U.S. Food and Drug Administration (FDA) authenticated fish tissue samples used for primers designing and testing

| Sample ID | Species ID                         | Genbank Accession number | Sample ID | Species ID                         | Genbank Accession number | Sample ID | Species ID                      | Genbank Accession number | Sample ID | Species ID                         | Genbank Accession number |
|-----------|------------------------------------|--------------------------|-----------|------------------------------------|--------------------------|-----------|---------------------------------|--------------------------|-----------|------------------------------------|--------------------------|
| FDA 14    | <i>Rhomboplites aurorubens</i>     | HQ025004                 | FDA 44    | <i>Echeneis neucratoides</i>       | KF461171                 | FDA 74    | <i>Lagocephalus laevigatus</i>  | KF461191                 | FDA 106   | <i>Carcharhinus isodon</i>         | KF461150                 |
| FDA 15    | <i>Morone saxatilis</i>            | HQ024976                 | FDA 45    | <i>Centropristis ocyurus</i>       | KF461154                 | FDA 75    | <i>Brama dussumieri</i>         | KF461140                 | FDA 107   | <i>Carcharhinus leucas</i>         | KF461151                 |
| FDA 17    | <i>Paralichthys lethostigma</i>    | HQ024992                 | FDA 46    | <i>Rypticus saponaceus</i>         | KF461229                 | FDA 76    | <i>Paralichthys lethostigma</i> | KF461217                 | FDA 108   | <i>Dasyatis sabina</i>             | KF461169                 |
| FDA 18    | <i>Morone americana</i>            | HQ024972                 | FDA 47    | <i>Prionotus rubio</i>             | KF461223                 | FDA 77    | <i>Rhomboplites aurorubens</i>  | KF461227                 | FDA 109   | <i>Carcharhinus acronotus</i>      | KF461148                 |
| FDA 19    | <i>Centropristis striata</i>       | HQ024936                 | FDA 48    | <i>Chilomycterus schoepfii</i>     | KF461157                 | FDA 78    | <i>Balistes vetula</i>          | KF461139                 | FDA 134   | <i>Mugil cephalus</i>              | n/a*                     |
| FDA 20    | <i>Oreochromis niloticus</i>       | HQ024988                 | FDA 49    | <i>Lutjanus campechanus</i>        | KF461194                 | FDA 79    | <i>Chaetodipterus faber</i>     | KF461156                 | FDA 135   | <i>Epinephelus flavolimbatus</i>   | n/a*                     |
| FDA 21    | <i>Urophycis chuss</i>             | HQ025024                 | FDA 50    | <i>Lutjanus synagris</i>           | KF461200                 | FDA 80    | <i>Scomberomorus cavalla</i>    | KF461231                 | FDA 136   | <i>Mycteroperca bonaci</i>         | n/a*                     |
| FDA 22    | <i>Merluccius bilinearis</i>       | HQ024964                 | FDA 52    | <i>Hemanthias leptus</i>           | KF461187                 | FDA 81    | <i>Pareques umbrosus</i>        | KF461219                 | FDA 146   | <i>Symphoricarichthys spilurus</i> | n/a*                     |
| FDA 23    | <i>Micropogonias undulatus</i>     | HQ024968                 | FDA 54    | <i>Helicolenus dactylopterus</i>   | KF461186                 | FDA 82    | <i>Caulolatilus chrysops</i>    | KF461153                 | FDA 147   | <i>Macolor macularis</i>           | n/a*                     |
| FDA 25    | <i>Leiostomus xanthurus</i>        | HQ024956                 | FDA 55    | <i>Kyphosus incisor</i>            | KF461190                 | FDA 83    | <i>Trachinotus carolinus</i>    | KF461244                 | FDA 151   | <i>Diagramma pictum</i>            | n/a*                     |
| FDA 26    | <i>Stenotmus chrysops</i>          | HQ025020                 | FDA 56    | <i>Bagre marinus</i>               | KF461135                 | FDA 84    | <i>Selene setapinnis</i>        | KF461235                 | FDA 153   | <i>Lutjanus rivulatus</i>          | n/a*                     |
| FDA 27    | <i>Pomatomus saltatrix</i>         | HQ025000                 | FDA 57    | <i>Elops saurus</i>                | KF461177                 | FDA 86    | <i>Euthynnus alletteratus</i>   | KF461180                 | FDA 156   | <i>Epinephelus polyphekadion</i>   | n/a*                     |
| FDA 24    | <i>Salmo salar</i>                 | HQ025008                 | FDA 58    | <i>Lutjanus griseus</i>            | KF461196                 | FDA 87    | <i>Lobotes surinamensis</i>     | KF461193                 | FDA 158   | <i>Lutjanus argentimaculatus</i>   | n/a*                     |
| FDA 29    | <i>Ocyurus chrysurus</i>           | HQ024984                 | FDA 59    | <i>Balistes capriscus</i>          | KF461137                 | FDA 88    | <i>Scomberomorus maculatus</i>  | KF461233                 | FDA 159   | <i>Epinephelus undulosus</i>       | n/a*                     |
| FDA 32    | <i>Scomberomorus regalis</i>       | HQ025016                 | FDA 60    | <i>Hyperoglyphe bythites</i>       | KF461189                 | FDA 89    | <i>Ophichthus gomesii</i>       | KF461209                 | FDA 160   | <i>Lutjanus bohar</i>              | n/a*                     |
| FDA 33    | <i>Mugil cephalus</i>              | HQ024980                 | FDA 61    | <i>Calamus leucosteus</i>          | KF461142                 | FDA 90    | <i>Centropristis ocyurus</i>    | KF461155                 | FDA 162   | <i>Epinephelus coioides</i>        | n/a*                     |
| FDA 34    | <i>Peprilus paru</i>               | HQ024996                 | FDA 62    | <i>Pomatomus saltatrix</i>         | KF461220                 | FDA 91    | <i>Pagrus pagrus</i>            | KF461214                 | FDA 164   | <i>Lutjanus malabaricus</i>        | n/a*                     |
| FDA 35    | <i>Haemulon plumierii</i>          | HQ024940                 | FDA 63    | <i>Archosargus probatocephalus</i> | KF461133                 | FDA 92    | <i>Scorpaena dispar</i>         | KF461234                 | FDA 165   | <i>Lutjanus synagris</i>           | n/a*                     |
| FDA 36    | <i>Lagodon rhomboides</i>          | HQ024952                 | FDA 64    | <i>Selene vomer</i>                | KF461236                 | FDA 95    | <i>Cynoscion arenarius</i>      | KF461163                 | FDA 166   | <i>Epinephelus guttatus</i>        | n/a*                     |
| FDA 37    | <i>Archosargus probatocephalus</i> | HQ024932                 | FDA 66    | <i>Rachycentron canadum</i>        | KF461225                 | FDA 97    | <i>Haemulon aurolineatum</i>    | KF461185                 | FDA 168   | <i>Cynoscion nebulosus</i>         | KF461166                 |
| FDA 38    | <i>Sciaenops ocellatus</i>         | HQ025012                 | FDA 70    | <i>Lutjanus griseus</i>            | KF461197                 | FDA 98    | <i>Chloroscombrus chrysurus</i> | KF461158                 | FDA 169   | <i>Corniger spinosus</i>           | KF461160                 |
| FDA 39    | <i>Ictalurus punctatus</i>         | HQ024944                 | FDA 71    | <i>Canthidermis maculata</i>       | KF461143                 | FDA 99    | <i>Ariopsis felis</i>           | KF461134                 | FDA 170   | <i>Synodus foetens</i>             | KF461243                 |
| FDA 42    | <i>Elagatis bipinnulata</i>        | KF461174                 | FDA 72    | <i>Pristigenys alta</i>            | KF461224                 | FDA 100   | <i>Sphyrna tiburo</i>           | KF461242                 | FDA 178   | <i>Lepidocybium flavobrunneum</i>  | KF461192                 |
| FDA 43    | <i>Opsanus pardus</i>              | KF461213                 | FDA 73    | <i>Holocentrus rufus</i>           | KF461188                 | FDA 102   | <i>Carcharhinus brevipinna</i>  | KF461149                 | FDA 182   | <i>Conger oceanicus</i>            | KF461159                 |

\*Sequences located here: [http://www.accessdata.fda.gov/scripts/fdcc/?set=seafood\\_barcode\\_data](http://www.accessdata.fda.gov/scripts/fdcc/?set=seafood_barcode_data)

**Table S2** Detailed results of *in silico* analysis of the taxonomic resolution achieved by the six mini-barcoding regions when compared across 200 species from 124 genera using DNA barcodes from authenticated FDA reference samples. Analysis was carried out based on sequence identity cut-off levels of 98% and 100%

| 98% | FDA                         | Primer sets |   |   |   |   |   | FDA     | Primer sets                |   |   |   |   |   | FDA     | Primer sets               |   |   |   |   |   |  |
|-----|-----------------------------|-------------|---|---|---|---|---|---------|----------------------------|---|---|---|---|---|---------|---------------------------|---|---|---|---|---|--|
|     | Species                     | A           | B | C | D | E | F | Species | A                          | B | C | D | E | F | Species | A                         | B | C | D | E | F |  |
| 1   | Aethaloperca rogaa          |             |   |   |   |   |   | 41      | Diagramma pictum           |   |   |   |   |   | 81      | Lethrinus erythraeanthus  |   |   |   |   |   |  |
| 2   | Alectis ciliaris            |             |   |   |   |   |   | 42      | Dissostichus eleginoides   |   |   |   |   |   | 82      | Lethrinus lentjan         |   |   |   |   |   |  |
| 3   | Anarhichas lupus            |             |   |   |   |   |   | 43      | Echeneis neucratoides      |   |   |   |   |   | 83      | Lethrinus microdon        |   |   |   |   |   |  |
| 4   | Aprion virescens            |             |   |   |   |   |   | 44      | Echiophis punctifer        |   |   |   |   |   | 84      | Limanda ferruginea        |   |   |   |   |   |  |
| 5   | Archosargus probatocephalus |             |   |   |   |   |   | 45      | Elagatis bipinnulata       |   |   |   |   |   | 85      | Lobotes surinamensis      |   |   |   |   |   |  |
| 6   | Ariopsis felis              |             |   |   |   |   |   | 46      | Elops saurus               |   |   |   |   |   | 86      | Lophius americanus        |   |   |   |   |   |  |
| 7   | Bagre marinus               |             |   |   |   |   |   | 47      | Eopsetta jordani           |   |   |   |   |   | 87      | Lophius litulon           |   |   |   |   |   |  |
| 8   | Balistes capriscus          |             |   |   |   |   |   | 48      | Epinephalus bleekeri       |   |   |   |   |   | 88      | Lutjanus argentimaculatus |   |   |   |   |   |  |
| 9   | Balistes vetula             |             |   |   |   |   |   | 49      | Epinephalus flavolimbatus  |   |   |   |   |   | 89      | Lutjanus bohar            |   |   |   |   |   |  |
| 10  | Brama dussumieri            |             |   |   |   |   |   | 50      | Epinephalus maculatus      |   |   |   |   |   | 90      | Lutjanus campechanus      |   |   |   |   |   |  |
| 11  | Brosme brosme               |             |   |   |   |   |   | 51      | Epinephelus adscensionis   |   |   |   |   |   | 91      | Lutjanus griseus          |   |   |   |   |   |  |
| 12  | Brotula barbata             |             |   |   |   |   |   | 52      | Epinephelus coioides       |   |   |   |   |   | 92      | Lutjanus guttatus         |   |   |   |   |   |  |
| 13  | Calamus leucosteus          |             |   |   |   |   |   | 53      | Epinephelus drummondhayi   |   |   |   |   |   | 93      | Lutjanus jocu             |   |   |   |   |   |  |
| 14  | Canthidermis maculata       |             |   |   |   |   |   | 54      | Epinephelus guttatus       |   |   |   |   |   | 94      | Lutjanus malabaricus      |   |   |   |   |   |  |
| 15  | Canthidermis sufflamen      |             |   |   |   |   |   | 55      | Epinephelus polyphkadion   |   |   |   |   |   | 95      | Lutjanus peru             |   |   |   |   |   |  |
| 16  | Caranx caninus              |             |   |   |   |   |   | 56      | Epinephelus quoyanus       |   |   |   |   |   | 96      | Lutjanus rivulatus        |   |   |   |   |   |  |
| 17  | Caranx crysos               |             |   |   |   |   |   | 57      | Epinephelus rivulatus      |   |   |   |   |   | 97      | Lutjanus synagris         |   |   |   |   |   |  |
| 18  | Caranx hippos               |             |   |   |   |   |   | 58      | Epinephelus undulosus      |   |   |   |   |   | 98      | Macolor macularis         |   |   |   |   |   |  |
| 19  | Carcharhinus acronotus      |             |   |   |   |   |   | 59      | Euthynnus affinis          |   |   |   |   |   | 99      | Malacanthus plumieri      |   |   |   |   |   |  |
| 20  | Carcharhinus brevipinna     |             |   |   |   |   |   | 60      | Euthynnus alletteratus     |   |   |   |   |   | 100     | Melanogrammus aeglefinus  |   |   |   |   |   |  |
| 21  | Carcharhinus isodon         |             |   |   |   |   |   | 61      | Gadus macrocephalus        |   |   |   |   |   | 101     | Menticirrhus americanus   |   |   |   |   |   |  |
| 22  | Carcharhinus leucas         |             |   |   |   |   |   | 62      | Gadus morhua               |   |   |   |   |   | 102     | Merluccius bilnearis      |   |   |   |   |   |  |
| 23  | Carcharhinus limbatus       |             |   |   |   |   |   | 63      | Gempylus serpens           |   |   |   |   |   | 103     | Micropogonias undulatus   |   |   |   |   |   |  |
| 24  | Caulolatilus chrysops       |             |   |   |   |   |   | 64      | Glyptocephalus cynoglossus |   |   |   |   |   | 104     | Microstomus pacificus     |   |   |   |   |   |  |
| 25  | Centropristis ocyurus       |             |   |   |   |   |   | 65      | Gymnothorax kolpos         |   |   |   |   |   | 105     | Morone americana          |   |   |   |   |   |  |
| 26  | Centropristis striata       |             |   |   |   |   |   | 66      | Haemulon aurolineatum      |   |   |   |   |   | 106     | Morone saxatilis          |   |   |   |   |   |  |
| 27  | Cephalopholis argus         |             |   |   |   |   |   | 67      | Haemulon plumieri          |   |   |   |   |   | 107     | Mugil cephalus            |   |   |   |   |   |  |
| 28  | Cephalopholis fulva         |             |   |   |   |   |   | 68      | Helicolenus dactylopterus  |   |   |   |   |   | 108     | Muraena retifera          |   |   |   |   |   |  |
| 29  | Cephalopholis sonnerati     |             |   |   |   |   |   | 69      | Hemanthias leptus          |   |   |   |   |   | 109     | Mycteroperca bonaci       |   |   |   |   |   |  |
| 30  | Chaetodipterus faber        |             |   |   |   |   |   | 70      | Holocentrus rufus          |   |   |   |   |   | 110     | Mycteroperca microlepis   |   |   |   |   |   |  |
| 31  | Chanoschanos                |             |   |   |   |   |   | 71      | Hyperoglyphe bythites      |   |   |   |   |   | 111     | Narcine bancroftii        |   |   |   |   |   |  |
| 32  | Chilomycterus schoepfi      |             |   |   |   |   |   | 72      | Ictalurus furcatus         |   |   |   |   |   | 112     | Neomerinthe hemingwayi    |   |   |   |   |   |  |
| 33  | Chloroscombrus chrysurus    |             |   |   |   |   |   | 73      | Ictalurus punctatus        |   |   |   |   |   | 113     | Ocyurus chrysurus         |   |   |   |   |   |  |
| 34  | Conger oceanicus            |             |   |   |   |   |   | 74      | Ictiobus cyprinellus       |   |   |   |   |   | 114     | Oncorhynchus gorboscha    |   |   |   |   |   |  |
| 35  | Corniger spinosus           |             |   |   |   |   |   | 75      | Katsuwonus pelamis         |   |   |   |   |   | 115     | Oncorhynchus kisutch      |   |   |   |   |   |  |
| 36  | Cynoscion arenarius         |             |   |   |   |   |   | 76      | Kyphosus incisor           |   |   |   |   |   | 116     | Oncorhynchus mykiss       |   |   |   |   |   |  |
| 37  | Cynoscion nebulosus         |             |   |   |   |   |   | 77      | Lagocephalus laevigatus    |   |   |   |   |   | 117     | Ophichthus gomesii        |   |   |   |   |   |  |
| 38  | Dasyatis americana          |             |   |   |   |   |   | 78      | Lagodon rhomboides         |   |   |   |   |   | 118     | Ophichthus rex            |   |   |   |   |   |  |
| 39  | Dasyatis sabina             |             |   |   |   |   |   | 79      | Leiostomus xanthurus       |   |   |   |   |   | 119     | Ophiodon elongatus        |   |   |   |   |   |  |
| 40  | Diagramma melanacrum        |             |   |   |   |   |   | 80      | Lepidocybium flavobrunneum |   |   |   |   |   | 120     | Opsanus beta              |   |   |   |   |   |  |

 Recovered to species level

 Recovered to genus level

 Not recovered

| 98% | FDA                               | Primer sets |   |   |   |   |   |     | FDA                            | Primer sets |   |   |   |   |   |
|-----|-----------------------------------|-------------|---|---|---|---|---|-----|--------------------------------|-------------|---|---|---|---|---|
|     | Species                           | A           | B | C | D | E | F |     | Species                        | A           | B | C | D | E | F |
| 121 | <i>Opsanus pardus</i>             |             |   |   |   |   |   | 161 | <i>Sebastes maliger</i>        |             |   |   |   |   |   |
| 122 | <i>Oreochromis mossambicus</i>    |             |   |   |   |   |   | 162 | <i>Sebastes norvegicus</i>     |             |   |   |   |   |   |
| 123 | <i>Oreochromis niloticus</i>      |             |   |   |   |   |   | 163 | <i>Sebastes pinniger</i>       |             |   |   |   |   |   |
| 124 | <i>Pagrus pagrus</i>              |             |   |   |   |   |   | 164 | <i>Selene peruviana</i>        |             |   |   |   |   |   |
| 125 | <i>Pampus argenteus</i>           |             |   |   |   |   |   | 165 | <i>Selene setapinnis</i>       |             |   |   |   |   |   |
| 126 | <i>Pangasius bocourti</i>         |             |   |   |   |   |   | 166 | <i>Selene vomer</i>            |             |   |   |   |   |   |
| 127 | <i>Pangasius conchophilus</i>     |             |   |   |   |   |   | 167 | <i>Semicossyphus pulcher</i>   |             |   |   |   |   |   |
| 128 | <i>Pangasius hypophthalmus</i>    |             |   |   |   |   |   | 168 | <i>Seriola dumerili</i>        |             |   |   |   |   |   |
| 129 | <i>Paralichthys albigutta</i>     |             |   |   |   |   |   | 169 | <i>Seriola lalandi</i>         |             |   |   |   |   |   |
| 130 | <i>Paralichthys lethostigma</i>   |             |   |   |   |   |   | 170 | <i>Seriola rivoliana</i>       |             |   |   |   |   |   |
| 131 | <i>Paranthias furcifer</i>        |             |   |   |   |   |   | 171 | <i>Siganus javus</i>           |             |   |   |   |   |   |
| 132 | <i>Pareques umbrosus</i>          |             |   |   |   |   |   | 172 | <i>Sphoeroides nephelus</i>    |             |   |   |   |   |   |
| 133 | <i>Peprilus paru</i>              |             |   |   |   |   |   | 173 | <i>Sphoeroides spengleri</i>   |             |   |   |   |   |   |
| 134 | <i>Platichthys stellatus</i>      |             |   |   |   |   |   | 174 | <i>Sphoeroides testudineus</i> |             |   |   |   |   |   |
| 135 | <i>Pleuronectes americanus</i>    |             |   |   |   |   |   | 175 | <i>Sphyaena argentea</i>       |             |   |   |   |   |   |
| 136 | <i>Pleuronectes vetulus</i>       |             |   |   |   |   |   | 176 | <i>Sphyaena barracuda</i>      |             |   |   |   |   |   |
| 137 | <i>Pogonias cromis</i>            |             |   |   |   |   |   | 177 | <i>Sphyaena guachancho</i>     |             |   |   |   |   |   |
| 138 | <i>Pollachius virens</i>          |             |   |   |   |   |   | 178 | <i>Sphyrna lewini</i>          |             |   |   |   |   |   |
| 139 | <i>Pomadasys kaakan</i>           |             |   |   |   |   |   | 179 | <i>Sphyrna tiburo</i>          |             |   |   |   |   |   |
| 140 | <i>Pomatomus saltatrix</i>        |             |   |   |   |   |   | 180 | <i>Stenotomus chrysops</i>     |             |   |   |   |   |   |
| 141 | <i>Prionotus rubio</i>            |             |   |   |   |   |   | 181 | <i>Symphorichthys spilurus</i> |             |   |   |   |   |   |
| 142 | <i>Pristigenys alta</i>           |             |   |   |   |   |   | 182 | <i>Symphorus nematophorus</i>  |             |   |   |   |   |   |
| 143 | <i>Rachycentron canadum</i>       |             |   |   |   |   |   | 183 | <i>Synodus foetens</i>         |             |   |   |   |   |   |
| 144 | <i>Reinhardtius stomias</i>       |             |   |   |   |   |   | 184 | <i>Takifugu chinensis</i>      |             |   |   |   |   |   |
| 145 | <i>Rhizoprionodon terraenovae</i> |             |   |   |   |   |   | 185 | <i>Takifugu niphobles</i>      |             |   |   |   |   |   |
| 146 | <i>Rhomboplites aurorbens</i>     |             |   |   |   |   |   | 186 | <i>Takifugu ocellatus</i>      |             |   |   |   |   |   |
| 147 | <i>Ruvettus pretiosus</i>         |             |   |   |   |   |   | 187 | <i>Takifugu pardalis</i>       |             |   |   |   |   |   |
| 148 | <i>Rypticus saponaceus</i>        |             |   |   |   |   |   | 188 | <i>Takifugu poecilonotus</i>   |             |   |   |   |   |   |
| 149 | <i>Salmo salar</i>                |             |   |   |   |   |   | 189 | <i>Takifugu porphyreus</i>     |             |   |   |   |   |   |
| 150 | <i>Sciaenops ocellatus</i>        |             |   |   |   |   |   | 190 | <i>Takifugu snyderi</i>        |             |   |   |   |   |   |
| 151 | <i>Scomber japonicus</i>          |             |   |   |   |   |   | 191 | <i>Takifugu vermicularis</i>   |             |   |   |   |   |   |
| 152 | <i>Scomberomorus cavalla</i>      |             |   |   |   |   |   | 192 | <i>Takifugu zanthopterus</i>   |             |   |   |   |   |   |
| 153 | <i>Scomberomorus maculatus</i>    |             |   |   |   |   |   | 193 | <i>Theragra chalcogramma</i>   |             |   |   |   |   |   |
| 154 | <i>Scomberomorus regalis</i>      |             |   |   |   |   |   | 194 | <i>Thunnus alalunga</i>        |             |   |   |   |   |   |
| 155 | <i>Scophthalmus aquosus</i>       |             |   |   |   |   |   | 195 | <i>Thunnus albacares</i>       |             |   |   |   |   |   |
| 156 | <i>Scorpaena dispar</i>           |             |   |   |   |   |   | 196 | <i>Trachinotus carolinus</i>   |             |   |   |   |   |   |
| 157 | <i>Sebastes aleutianus</i>        |             |   |   |   |   |   | 197 | <i>Trichiurus lepturus</i>     |             |   |   |   |   |   |
| 158 | <i>Sebastes alutus</i>            |             |   |   |   |   |   | 198 | <i>Urophycis chuss</i>         |             |   |   |   |   |   |
| 159 | <i>Sebastes entomelas</i>         |             |   |   |   |   |   | 199 | <i>Variola louti</i>           |             |   |   |   |   |   |
| 160 | <i>Sebastes flavidus</i>          |             |   |   |   |   |   | 200 | <i>Zeus faber</i>              |             |   |   |   |   |   |

 Recovered to species level

 Recovered to genus level

 Not recovered

| 100% | FDA                         | Primer sets |   |   |   |   |   |    | FDA                        | Primer sets |   |   |   |   |   |     | FDA                       | Primer sets |   |   |   |   |   |
|------|-----------------------------|-------------|---|---|---|---|---|----|----------------------------|-------------|---|---|---|---|---|-----|---------------------------|-------------|---|---|---|---|---|
|      | Species                     | A           | B | C | D | E | F |    | Species                    | A           | B | C | D | E | F |     | Species                   | A           | B | C | D | E | F |
| 1    | Aethaloperca rogaea         |             |   |   |   |   |   | 41 | Diagramma pictum           |             |   |   |   |   |   | 81  | Lethrinus erythraeanthus  |             |   |   |   |   |   |
| 2    | Alectis ciliaris            |             |   |   |   |   |   | 42 | Dissostichus eleginoides   |             |   |   |   |   |   | 82  | Lethrinus lentjan         |             |   |   |   |   |   |
| 3    | Anarhichas lupus            |             |   |   |   |   |   | 43 | Echeneis neucratoides      |             |   |   |   |   |   | 83  | Lethrinus microdon        |             |   |   |   |   |   |
| 4    | Aprion virescens            |             |   |   |   |   |   | 44 | Echiophis punctifer        |             |   |   |   |   |   | 84  | Limanda ferruginea        |             |   |   |   |   |   |
| 5    | Archosargus probatocephalus |             |   |   |   |   |   | 45 | Elagatis bipinnulata       |             |   |   |   |   |   | 85  | Lobotes surinamensis      |             |   |   |   |   |   |
| 6    | Ariopsis felis              |             |   |   |   |   |   | 46 | Elops saurus               |             |   |   |   |   |   | 86  | Lophius americanus        |             |   |   |   |   |   |
| 7    | Bagre marinus               |             |   |   |   |   |   | 47 | Eopsetta jordani           |             |   |   |   |   |   | 87  | Lophius litulon           |             |   |   |   |   |   |
| 8    | Balistes capriscus          |             |   |   |   |   |   | 48 | Epinephalus bleekeri       |             |   |   |   |   |   | 88  | Lutjanus argentimaculatus |             |   |   |   |   |   |
| 9    | Balistes vetula             |             |   |   |   |   |   | 49 | Epinephalus flavolimbatus  |             |   |   |   |   |   | 89  | Lutjanus bohar            |             |   |   |   |   |   |
| 10   | Brama dussumieri            |             |   |   |   |   |   | 50 | Epinephalus maculatus      |             |   |   |   |   |   | 90  | Lutjanus campechanus      |             |   |   |   |   |   |
| 11   | Brosme brosme               |             |   |   |   |   |   | 51 | Epinephelus adscensionis   |             |   |   |   |   |   | 91  | Lutjanus griseus          |             |   |   |   |   |   |
| 12   | Brotula barbata             |             |   |   |   |   |   | 52 | Epinephelus coioides       |             |   |   |   |   |   | 92  | Lutjanus guttatus         |             |   |   |   |   |   |
| 13   | Calamus leucosteus          |             |   |   |   |   |   | 53 | Epinephelus drummondhayi   |             |   |   |   |   |   | 93  | Lutjanus jocu             |             |   |   |   |   |   |
| 14   | Canthidermis maculata       |             |   |   |   |   |   | 54 | Epinephelus guttatus       |             |   |   |   |   |   | 94  | Lutjanus malabaricus      |             |   |   |   |   |   |
| 15   | Canthidermis sufflamen      |             |   |   |   |   |   | 55 | Epinephelus polyphemadion  |             |   |   |   |   |   | 95  | Lutjanus peru             |             |   |   |   |   |   |
| 16   | Caranx caninus              |             |   |   |   |   |   | 56 | Epinephelus quoyanus       |             |   |   |   |   |   | 96  | Lutjanus rivulatus        |             |   |   |   |   |   |
| 17   | Caranx crysos               |             |   |   |   |   |   | 57 | Epinephelus rivulatus      |             |   |   |   |   |   | 97  | Lutjanus synagris         |             |   |   |   |   |   |
| 18   | Caranx hippos               |             |   |   |   |   |   | 58 | Epinephelus undulosus      |             |   |   |   |   |   | 98  | Macolor macularis         |             |   |   |   |   |   |
| 19   | Carcharhinus acronotus      |             |   |   |   |   |   | 59 | Euthynnus affinis          |             |   |   |   |   |   | 99  | Malacanthus plumieri      |             |   |   |   |   |   |
| 20   | Carcharhinus brevipinna     |             |   |   |   |   |   | 60 | Euthynnus alletteratus     |             |   |   |   |   |   | 100 | Melanogrammus aeglefinus  |             |   |   |   |   |   |
| 21   | Carcharhinus isodon         |             |   |   |   |   |   | 61 | Gadus macrocephalus        |             |   |   |   |   |   | 101 | Menticirrhus americanus   |             |   |   |   |   |   |
| 22   | Carcharhinus leucas         |             |   |   |   |   |   | 62 | Gadus morhua               |             |   |   |   |   |   | 102 | Merluccius bilinearis     |             |   |   |   |   |   |
| 23   | Carcharhinus limbatus       |             |   |   |   |   |   | 63 | Gempylus serpens           |             |   |   |   |   |   | 103 | Micropogonias undulatus   |             |   |   |   |   |   |
| 24   | Caulolatilus chrysops       |             |   |   |   |   |   | 64 | Glyptocephalus cynoglossus |             |   |   |   |   |   | 104 | Microstomus pacificus     |             |   |   |   |   |   |
| 25   | Centropristis ocyurus       |             |   |   |   |   |   | 65 | Gymnothorax kolpos         |             |   |   |   |   |   | 105 | Morone americana          |             |   |   |   |   |   |
| 26   | Centropristis striata       |             |   |   |   |   |   | 66 | Haemulon aurolineatum      |             |   |   |   |   |   | 106 | Morone saxatilis          |             |   |   |   |   |   |
| 27   | Cephalopholis argus         |             |   |   |   |   |   | 67 | Haemulon plumieri          |             |   |   |   |   |   | 107 | Mugil cephalus            |             |   |   |   |   |   |
| 28   | Cephalopholis fulva         |             |   |   |   |   |   | 68 | Helicolenus dactylopterus  |             |   |   |   |   |   | 108 | Muraena retifera          |             |   |   |   |   |   |
| 29   | Cephalopholis sonnerati     |             |   |   |   |   |   | 69 | Hemanthias leptus          |             |   |   |   |   |   | 109 | Mycteroperca bonaci       |             |   |   |   |   |   |
| 30   | Chaetodipterus faber        |             |   |   |   |   |   | 70 | Holocentrus rufus          |             |   |   |   |   |   | 110 | Mycteroperca microlepis   |             |   |   |   |   |   |
| 31   | Chanoschanos                |             |   |   |   |   |   | 71 | Hyperoglyphe bythites      |             |   |   |   |   |   | 111 | Narcine bancroftii        |             |   |   |   |   |   |
| 32   | Chilomycterus schoepfi      |             |   |   |   |   |   | 72 | Ictalurus furcatus         |             |   |   |   |   |   | 112 | Neomerinthe hemingwayi    |             |   |   |   |   |   |
| 33   | Chloroscombrus chrysurus    |             |   |   |   |   |   | 73 | Ictalurus punctatus        |             |   |   |   |   |   | 113 | Ocyurus chrysurus         |             |   |   |   |   |   |
| 34   | Conger oceanicus            |             |   |   |   |   |   | 74 | Ictiobus cyprinellus       |             |   |   |   |   |   | 114 | Oncorhynchus gorbuscha    |             |   |   |   |   |   |
| 35   | Corniger spinosus           |             |   |   |   |   |   | 75 | Katsuwonus pelamis         |             |   |   |   |   |   | 115 | Oncorhynchus kisutch      |             |   |   |   |   |   |
| 36   | Cynoscion arenarius         |             |   |   |   |   |   | 76 | Kyphosus incisor           |             |   |   |   |   |   | 116 | Oncorhynchus mykiss       |             |   |   |   |   |   |
| 37   | Cynoscion nebulosus         |             |   |   |   |   |   | 77 | Lagocephalus laevigatus    |             |   |   |   |   |   | 117 | Ophichthus gomesii        |             |   |   |   |   |   |
| 38   | Dasyatis americana          |             |   |   |   |   |   | 78 | Lagodon rhomboides         |             |   |   |   |   |   | 118 | Ophichthus rex            |             |   |   |   |   |   |
| 39   | Dasyatis sabina             |             |   |   |   |   |   | 79 | Leiostomus xanthurus       |             |   |   |   |   |   | 119 | Ophiodon elongatus        |             |   |   |   |   |   |
| 40   | Diagramma melanacrum        |             |   |   |   |   |   | 80 | Lepidocybium flavobrunneum |             |   |   |   |   |   | 120 | Opsanus beta              |             |   |   |   |   |   |

| 100% | FDA                               | Primer sets |   |   |   |   |   |     | FDA                                | Primer sets |   |   |   |   |   |
|------|-----------------------------------|-------------|---|---|---|---|---|-----|------------------------------------|-------------|---|---|---|---|---|
|      | Species                           | A           | B | C | D | E | F |     | Species                            | A           | B | C | D | E | F |
| 121  | <i>Opsanus pardus</i>             |             |   |   |   |   |   | 161 | <i>Sebastes maliger</i>            |             |   |   |   |   |   |
| 122  | <i>Oreochromis mossambicus</i>    |             |   |   |   |   |   | 162 | <i>Sebastes norvegicus</i>         |             |   |   |   |   |   |
| 123  | <i>Oreochromis niloticus</i>      |             |   |   |   |   |   | 163 | <i>Sebastes pinniger</i>           |             |   |   |   |   |   |
| 124  | <i>Pagrus pagrus</i>              |             |   |   |   |   |   | 164 | <i>Selene peruviana</i>            |             |   |   |   |   |   |
| 125  | <i>Pampus argenteus</i>           |             |   |   |   |   |   | 165 | <i>Selene setapinnis</i>           |             |   |   |   |   |   |
| 126  | <i>Pangasius bocourti</i>         |             |   |   |   |   |   | 166 | <i>Selene vomer</i>                |             |   |   |   |   |   |
| 127  | <i>Pangasius conchophilus</i>     |             |   |   |   |   |   | 167 | <i>Semicossyphus pulcher</i>       |             |   |   |   |   |   |
| 128  | <i>Pangasius hypophthalmus</i>    |             |   |   |   |   |   | 168 | <i>Seriola dumerilii</i>           |             |   |   |   |   |   |
| 129  | <i>Paralichthys albigutta</i>     |             |   |   |   |   |   | 169 | <i>Seriola lalandi</i>             |             |   |   |   |   |   |
| 130  | <i>Paralichthys lethostigma</i>   |             |   |   |   |   |   | 170 | <i>Seriola rivoliana</i>           |             |   |   |   |   |   |
| 131  | <i>Paranthias furcifer</i>        |             |   |   |   |   |   | 171 | <i>Siganus javus</i>               |             |   |   |   |   |   |
| 132  | <i>Pareques umbrosus</i>          |             |   |   |   |   |   | 172 | <i>Sphoeroides nephelus</i>        |             |   |   |   |   |   |
| 133  | <i>Peprilus paru</i>              |             |   |   |   |   |   | 173 | <i>Sphoeroides spengleri</i>       |             |   |   |   |   |   |
| 134  | <i>Platichthys stellatus</i>      |             |   |   |   |   |   | 174 | <i>Sphoeroides testudineus</i>     |             |   |   |   |   |   |
| 135  | <i>Pleuronectes americanus</i>    |             |   |   |   |   |   | 175 | <i>Sphyrna argentea</i>            |             |   |   |   |   |   |
| 136  | <i>Pleuronectes vetulus</i>       |             |   |   |   |   |   | 176 | <i>Sphyrna barracuda</i>           |             |   |   |   |   |   |
| 137  | <i>Pogonias cromis</i>            |             |   |   |   |   |   | 177 | <i>Sphyrna guachancho</i>          |             |   |   |   |   |   |
| 138  | <i>Pollachius virens</i>          |             |   |   |   |   |   | 178 | <i>Sphyrna lewini</i>              |             |   |   |   |   |   |
| 139  | <i>Pomadasys kaakan</i>           |             |   |   |   |   |   | 179 | <i>Sphyrna tiburo</i>              |             |   |   |   |   |   |
| 140  | <i>Pomatomus saltatrix</i>        |             |   |   |   |   |   | 180 | <i>Stenotomus chrysops</i>         |             |   |   |   |   |   |
| 141  | <i>Prionotus rubio</i>            |             |   |   |   |   |   | 181 | <i>Symphoricarichthys spilurus</i> |             |   |   |   |   |   |
| 142  | <i>Pristigeyns alta</i>           |             |   |   |   |   |   | 182 | <i>Symphorus nematophorus</i>      |             |   |   |   |   |   |
| 143  | <i>Rachycentron canadum</i>       |             |   |   |   |   |   | 183 | <i>Synodus foetens</i>             |             |   |   |   |   |   |
| 144  | <i>Reinhardtius stomias</i>       |             |   |   |   |   |   | 184 | <i>Takifugu chinensis</i>          |             |   |   |   |   |   |
| 145  | <i>Rhizoprionodon terraenovae</i> |             |   |   |   |   |   | 185 | <i>Takifugu niphobles</i>          |             |   |   |   |   |   |
| 146  | <i>Rhomboplites aurorubens</i>    |             |   |   |   |   |   | 186 | <i>Takifugu ocellatus</i>          |             |   |   |   |   |   |
| 147  | <i>Ruvettus pretiosus</i>         |             |   |   |   |   |   | 187 | <i>Takifugu pardalis</i>           |             |   |   |   |   |   |
| 148  | <i>Rypticus saponaceus</i>        |             |   |   |   |   |   | 188 | <i>Takifugu poecilonotus</i>       |             |   |   |   |   |   |
| 149  | <i>Salmo salar</i>                |             |   |   |   |   |   | 189 | <i>Takifugu porphyreus</i>         |             |   |   |   |   |   |
| 150  | <i>Sciaenops ocellatus</i>        |             |   |   |   |   |   | 190 | <i>Takifugu snyderi</i>            |             |   |   |   |   |   |
| 151  | <i>Scomber japonicus</i>          |             |   |   |   |   |   | 191 | <i>Takifugu vermicularis</i>       |             |   |   |   |   |   |
| 152  | <i>Scomberomorus cavalla</i>      |             |   |   |   |   |   | 192 | <i>Takifugu zanthopterus</i>       |             |   |   |   |   |   |
| 153  | <i>Scomberomorus maculatus</i>    |             |   |   |   |   |   | 193 | <i>Theragra chalcogramma</i>       |             |   |   |   |   |   |
| 154  | <i>Scomberomorus regalis</i>      |             |   |   |   |   |   | 194 | <i>Thunnus alalunga</i>            |             |   |   |   |   |   |
| 155  | <i>Scophthalmus aquosus</i>       |             |   |   |   |   |   | 195 | <i>Thunnus albacares</i>           |             |   |   |   |   |   |
| 156  | <i>Scorpaena dispar</i>           |             |   |   |   |   |   | 196 | <i>Trachinotus carolinus</i>       |             |   |   |   |   |   |
| 157  | <i>Sebastes aleutianus</i>        |             |   |   |   |   |   | 197 | <i>Trichiurus lepturus</i>         |             |   |   |   |   |   |
| 158  | <i>Sebastes alutus</i>            |             |   |   |   |   |   | 198 | <i>Urophycis chuss</i>             |             |   |   |   |   |   |
| 159  | <i>Sebastes entomelas</i>         |             |   |   |   |   |   | 199 | <i>Variola louti</i>               |             |   |   |   |   |   |
| 160  | <i>Sebastes flavidus</i>          |             |   |   |   |   |   | 200 | <i>Zeus faber</i>                  |             |   |   |   |   |   |

Recovered to species level

Recovered to genus level

Not recovered
